# Supplementary material for: Characteristics and Outcomes of Stem Cell Transplant Patients during the COVID-19 Era: A Systematic Review and Meta-Analysis
Source: MDPI journal article supplement (doi:10.3390/healthcare12050530), 2024-02-23

**Supplementary Table S1.** MEDLINE search strategy.

| Search number | Search terms                                                                                                                                                                                                                                                                              |
|---------------|-------------------------------------------------------------------------------------------------------------------------------------------------------------------------------------------------------------------------------------------------------------------------------------------|
| 1             | COVID-19.rx,px,ox. or severe acute respiratory syndrome coronavirus 2.os.                                                                                                                                                                                                                 |
| 2             | ("COVID-19" or COVID19 or "COVID 2019" or "novel coronavirus" or "SARS-CoV" or "SARS-CoV-2" or "SARS2" or "2019-nCoV" or ncov19 or ncov-19 or "2019-novel CoV" or sarscov2 or sarscov-2 or Sars-coronavirus2 or Sars-coronavirus-2 or SARS-like coronavirus* or coronavirus-19).ti,ab,kf. |
| 3             | (coronavirus* or "corona virus*").ti,kf.                                                                                                                                                                                                                                                  |
| 4             | Coronavirus Infections/                                                                                                                                                                                                                                                                   |
| 5             | or/1-4                                                                                                                                                                                                                                                                                    |
| 6             | 20191201:20301231.(dt).                                                                                                                                                                                                                                                                   |
| 7             | 5 and 6 [COVID-19, SARS-COV-2]                                                                                                                                                                                                                                                            |
| 8             | limit 7 to English language                                                                                                                                                                                                                                                               |
| 9             | exp Neoplasms/                                                                                                                                                                                                                                                                            |
| 10            | (cancer* or neoplas* or tumo?r* or leuk?emia* or lymphoma* or melanoma* or carcinoma* or sarcoma* or oncolog*).ti,ab,kf.                                                                                                                                                                  |
| 11            | 9 or 10 [Cancer]                                                                                                                                                                                                                                                                          |
| 12            | 8 and 11                                                                                                                                                                                                                                                                                  |
| 13            | Bone Marrow Transplantation/                                                                                                                                                                                                                                                              |
| 14            | exp Stem Cell Transplantation/                                                                                                                                                                                                                                                            |
| 15            | ((("stem cell" or "bone marrow") adj3 transplant*).ti,ab,kf.                                                                                                                                                                                                                              |
| 16            | or/13-15 [Stem cell/bone marrow transplantation]                                                                                                                                                                                                                                          |
| 17            | 12 and 16 [COVID-19 + cancer patients + Stem cell/bone marrow transplantation]                                                                                                                                                                                                            |

**Supplementary Table S2.** Embase search strategy.

| Search number | Search terms                                                                                                                                                                                                                                                                              |
|---------------|-------------------------------------------------------------------------------------------------------------------------------------------------------------------------------------------------------------------------------------------------------------------------------------------|
| 1             | ("COVID-19" or COVID19 or "COVID 2019" or "novel coronavirus" or "SARS-CoV" or "SARS-CoV-2" or "SARS2" or "2019-nCoV" or ncov19 or ncov-19 or "2019-novel CoV" or sarscov2 or sarscov-2 or Sars-coronavirus2 or Sars-coronavirus-2 or SARS-like coronavirus* or coronavirus-19).ti,ab,kw. |
| 2             | (coronavirus* or "corona virus*").ti.                                                                                                                                                                                                                                                     |
| 3             | severe acute respiratory syndrome/                                                                                                                                                                                                                                                        |
| 4             | coronavirus infection/                                                                                                                                                                                                                                                                    |
| 5             | "coronavirus disease 2019"/                                                                                                                                                                                                                                                               |
| 6             | or/1-5                                                                                                                                                                                                                                                                                    |
| 7             | limit 6 to English language                                                                                                                                                                                                                                                               |
| 8             | exp malignant neoplasm/                                                                                                                                                                                                                                                                   |
| 9             | (cancer* or neoplas* or tumo?r* or leuk?emia* or lymphoma* or melanoma* or carcinoma* or sarcoma* or oncolog*).ti,ab.                                                                                                                                                                     |
| 10            | 8 or 9                                                                                                                                                                                                                                                                                    |
| 11            | 7 and 10                                                                                                                                                                                                                                                                                  |
| 12            | exp bone marrow transplantation/                                                                                                                                                                                                                                                          |
| 13            | exp stem cell transplantation/                                                                                                                                                                                                                                                            |
| 14            | (( "stem cell" or "bone marrow") adj3 transplant*).ti,ab.                                                                                                                                                                                                                                 |
| 15            | or/12-14                                                                                                                                                                                                                                                                                  |
| 16            | 11 and 15 [COVID-19 + cancer patients + Stem cell/bone marrow transplantation]                                                                                                                                                                                                            |

**Supplementary Table S3.** Web of Science search strategy.

| Search number | Search terms                                                                                                                                                                                                                                                                                 |
|---------------|----------------------------------------------------------------------------------------------------------------------------------------------------------------------------------------------------------------------------------------------------------------------------------------------|
| 1             | TOPIC: (((("COVID-19" or COVID19 or "COVID 2019" or "novel coronavirus" or "SARS-CoV" or "SARS-CoV-2" or "SARS2" or "2019-nCoV" or ncov19 or ncov-19 or "2019-novel CoV" or sarscov2 or sarscov-2 or Sars-coronavirus2 or Sars-coronavirus-2 or SARS-like coronavirus* or coronavirus-19) )) |
| 2             | TITLE: ((coronavirus* or "corona virus*") )                                                                                                                                                                                                                                                  |
| 3             | #1 OR #2                                                                                                                                                                                                                                                                                     |
| 4             | TS=((cancer OR neoplasm OR tumor OR leukemia OR lymphoma OR melanoma OR carcinoma OR sarcoma OR oncolog*))                                                                                                                                                                                   |
| 5             | #4 AND #3                                                                                                                                                                                                                                                                                    |
| 6             | TOPIC: (((("stem cell" or "bone marrow") NEAR/3 transplant*))                                                                                                                                                                                                                                |
| 7             | #6 AND #5 Indexes=SCI-EXPANDED, SSCI, A&HCI, CPCI-S, CPCI-SSH, ESCI                                                                                                                                                                                                                          |

**Supplementary Table S4.** Cochrane Library search strategy.

| Search number | Search terms                                                                                                                                                                                                                                                                              |
|---------------|-------------------------------------------------------------------------------------------------------------------------------------------------------------------------------------------------------------------------------------------------------------------------------------------|
| 1             | MeSH descriptor: [Coronavirus Infections] explode all trees                                                                                                                                                                                                                               |
| 2             | ("COVID-19" or COVID19 or "COVID 2019" or "novel coronavirus" or "SARS-CoV" or "SARS-CoV-2" or "SARS2" or "2019-nCoV" or ncov19 or ncov-19 or "2019-novel CoV" or sarscov2 or sarscov-2 or Sars-coronavirus2 or Sars-coronavirus-2 or "SARS-like coronavirus" or coronavirus-19):ti,ab,kw |
| 3             | (coronavirus or "corona virus"):ti                                                                                                                                                                                                                                                        |
| 4             | (coronavirus or "corona virus"):kw                                                                                                                                                                                                                                                        |
| 5             | (7-#4)                                                                                                                                                                                                                                                                                    |
| 6             | MeSH descriptor: [Neoplasms] explode all trees                                                                                                                                                                                                                                            |
| 7             | ((cancer or neoplas or tumour or leukemia or leukaemia or lymphoma or melanoma or carcinoma or sarcoma or oncolog* or malignanc*)):ti,ab,kw<br>(Word variations have been searched)                                                                                                       |
| 8             | #6 OR #7                                                                                                                                                                                                                                                                                  |
| 9             | #5 AND #8                                                                                                                                                                                                                                                                                 |
| 10            | MeSH descriptor: [Bone Marrow Transplantation] explode all trees                                                                                                                                                                                                                          |
| 11            | MeSH descriptor: [Cord Blood Stem Cell Transplantation] explode all trees                                                                                                                                                                                                                 |
| 12            | (( "stem cell" or "bone marrow") NEAR/3 transplant*):ti,ab,kw                                                                                                                                                                                                                             |
| 13            | (25-#12)                                                                                                                                                                                                                                                                                  |
| 14            | #9 AND #13                                                                                                                                                                                                                                                                                |

**Supplementary Table S5.** Appraisal and quality assessment of the included studies

A. Case report appraisal

| Author/year           | Total Points |
|-----------------------|--------------|
| Nazon 2020            | 6/8          |
| Rossof 2020           | 6/8          |
| De Giorgi 2020        | 6/8          |
| Onaka 2020            | 7/8          |
| Jarmolinski 2020      | 7/8          |
| Flores 2020           | 7/8          |
| Innes 2020            | 7/8          |
| Karatas 2020          | 7/8          |
| Angelini 2020         | 7/8          |
| Nawar 2020            | 7/8          |
| Huang 2020            | 7/8          |
| Al Yazidi 2020        | 7/8          |
| Balashov 2021         | 7/8          |
| Foss 2020             | 7/8          |
| Issa 2020             | 7/8          |
| Krengli 2020          | 7/8          |
| Lazaro Del Campo 2021 | 6/8          |

B. Case series appraisal

| Author/year        | Total points |
|--------------------|--------------|
| Dufour 2020        | 10/10        |
| Vicent 2020        | 9/10         |
| Dhakal 2020        | 9/10         |
| Haroon 2020        | 9/10         |
| de Rojas 2020      | 8/10         |
| Garnica 2020       | 10/10        |
| Kanellopoulos 2020 | 9/10         |
| Aydillo T 2020     | 6/10         |
| Faura 2020         | 9/10         |
| Niu 2020           | 9/10         |

C. NOS appraisal

| Author/year            | Selection | Comparability | Outcome | Total |
|------------------------|-----------|---------------|---------|-------|
| Bisogno 2020           | 3         | 1             | 2       | 6     |
| Pinana 2020            | 4         | 2             | 3       | 9     |
| Shah 2020              | 4         | 2             | 3       | 9     |
| Wang 2020              | 4         | 2             | 3       | 9     |
| Fox 2020               | 4         | 2             | 3       | 9     |
| Garcia-Suarez 2020     | 4         | 2             | 3       | 9     |
| Jimenez-Kurlander 2021 | 4         | 1             | 3       | 8     |
| Rouger-Gaudichon 2020  | 3         | 1             | 3       | 7     |
| Sanchez-Pina 2020      | 4         | 2             | 3       | 9     |

**Supplementary Figure S1.** Flow diagram of the Preferred Reporting Items for Systematic Reviews and Meta-Analyses guidelines.

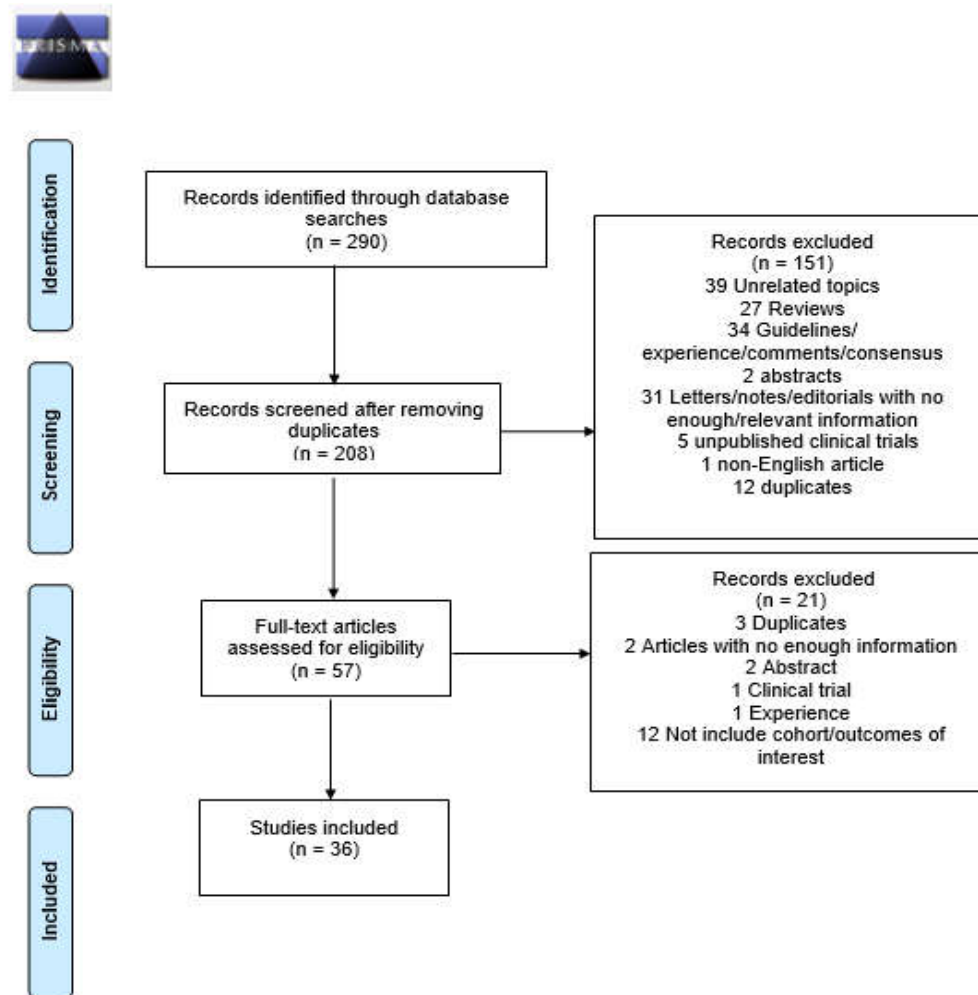

From: Moher D, Liberati A, Tetzlaff J, Altman DG, The PRISMA Group (2009). Preferred Reporting Items for Systematic Reviews and Meta-Analyses: The PRISMA Statement. PLoS Med 6(7): e1000097. doi:10.1371/journal.pmed.1000097

For more information, visit [www.prisma-statement.org](http://www.prisma-statement.org).

**Supplementary Figure S2.** PERs for the use of antibiotics for treatment of COVID-19.

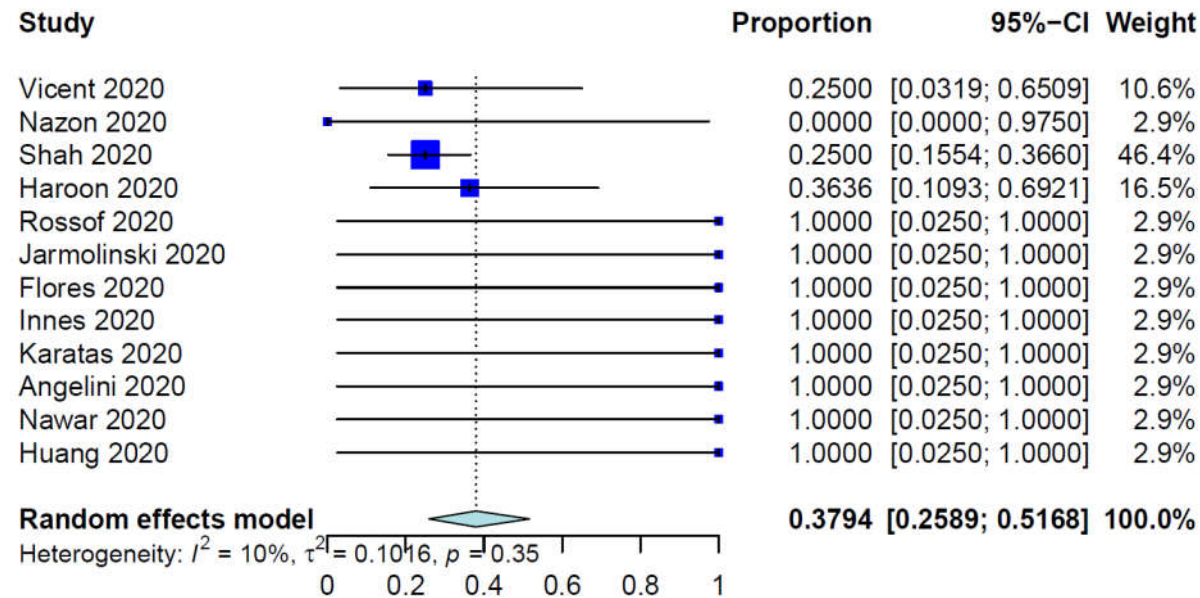



**Supplementary Figure S3.** PERs for the use of steroids for treatment of COVID-19.

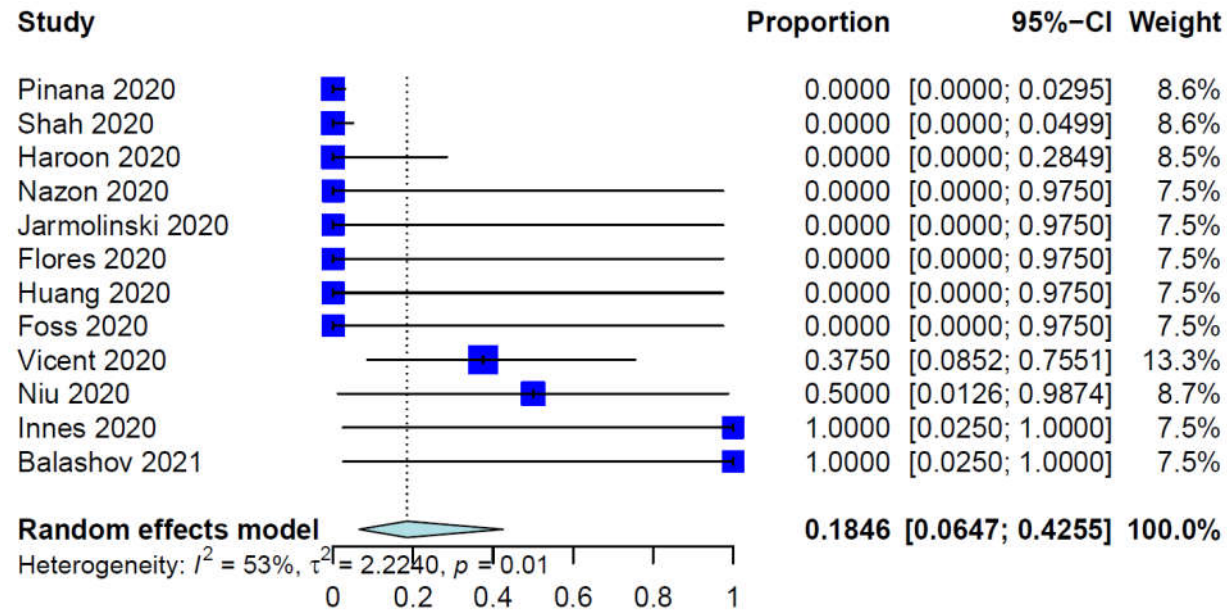

**Supplementary Figure S4.** PERs for the timing of SARS-CoV-2 infection in relation to SCT. **(A)** Zero to 100 days after SCT. **(B)** One hundred days to 6 months after SCT. **(C)** More than 6 months after SCT.

A

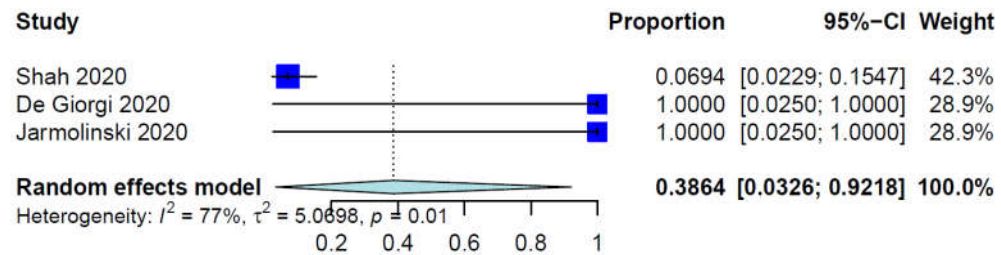

B

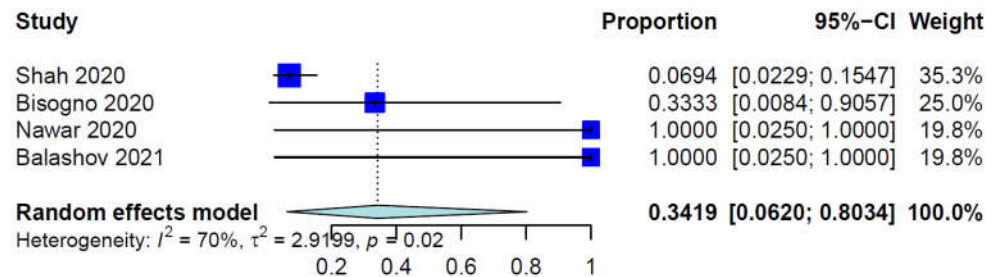

C

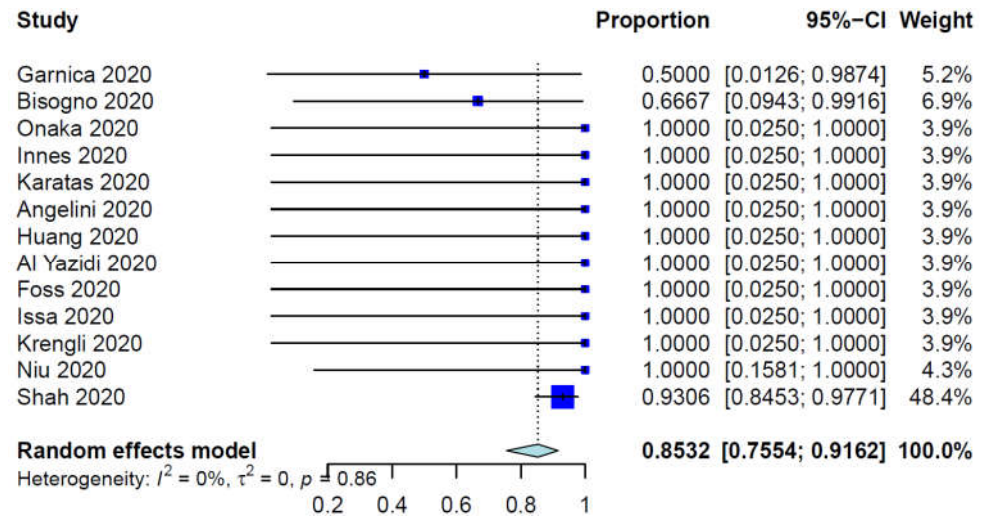

Supplement: s1 [file s1]
